# Supplementary material for: Temperature evolution following joint loading promotes chondrogenesis by synergistic cues via calcium signaling
Source: eLife. 2022 Mar 8;11:e72068. doi: 10.7554/eLife.72068 (PMC8903839; doi:10.7554/eLife.72068)
Supplement: Figure 3—source data 1. [file elife-72068-fig3-data1.xlsx]

## Sheet: Data-Figure 3-Genes
Relative Gene Expression
Sox9	Control (32.5oC)	Mechanical (32.5oC)	Thermal (32.5-39oC)	Thermo-Mech (32.5-39oC)	Free Swelling (37oC)	Mechanical (37oC)
1	0.966708	1.83426	2.04119	3.65253	1.13672	3.34146
2	1.30192	2.36512	1.64723	4.59826	1.19385	3.70339
3	0.843852	2.14062	1.86451	4.54538	1.2469	3.37511
4	0.94157	2.63412	2.06752	3.2193	1.25461	2.695
5	0.866485				2.22562
6	1.15409
Col-II	Control (32.5oC)	Mechanical (32.5oC)	Thermal (32.5-39oC)	Thermo-Mech (32.5-39oC)	Free Swelling (37oC)	Mechanical (37oC)
1	1.20785	0.832281	4.83798	8.23589	3.45547	3.31409
2	0.463145	2.17868	1.87314	4.98279	1.70285	1.91413
3	1.7876	1.13044	4.14377	5.58248	3.27026	2.61723
4	1.39818	5.86271	7.43166	5.03863	6.92073	3.95544
5	0.715214				7.42974
6
Twist1	Control (32.5oC)	Mechanical (32.5oC)	Thermal (32.5-39oC)	Thermo-Mech (32.5-39oC)	Free Swelling (37oC)	Mechanical (37oC)
1	0.933029	1.51435	0.665773	0.941426	0.882305	1.10082
2	1.3073	1.74634	0.782132	0.833054	1.0724	0.897276
3	0.835882	1.52659	0.721111	0.751371	0.945192	1.01412
4	0.980814	1.13826	0.703016	0.915985	0.882276	0.770222
5	1.07209			0.562216
6	0.932758			0.593755
Agc	Control (32.5oC)	Mechanical (32.5oC)	Thermal (32.5-39oC)	Thermo-Mech (32.5-39oC)	Free Swelling (37oC)	Mechanical (37oC)
1	1.04158	0.875826	1.25808	1.20773	0.330031	0.627747
2	1.01145	1.28147	0.980885	1.19195	0.224214	0.414746
3	0.949212	1.3593	1.34872	1.49147	0.491906	0.432622
4	0.976191	1.01054	1.46279	1.63772	0.362849	0.288016
5	1.02439				1.24509
6
Col-I	Control (32.5oC)	Mechanical (32.5oC)	Thermal (32.5-39oC)	Thermo-Mech (32.5-39oC)	Free Swelling (37oC)	Mechanical (37oC)
1	1.02987	0.899206	1.02536	1.07239	0.633401	1.11939
2	1.07638	1.03052	1.12985	1.19941	0.503947	1.07298
3	1.00302	1.29991	1.28584	1.56465	0.78509	1.31139
4	0.902099	1.0986	1.25976	0.916321	0.677625	0.925467
5	0.86553				1.11922
6	1.15536
COMP	Control (32.5oC)	Mechanical (32.5oC)	Thermal (32.5-39oC)	Thermo-Mech (32.5-39oC)	Free Swelling (37oC)	Mechanical (37oC)
1	1.05749	1.03519	1.31346	2.2299	0.650195	1.26783
2	1.13445	1.62447	1.21391	1.53836	0.65518	1.08445
3	0.960712	1.66197	1.61078	2.15786	0.524362	0.851122
4	0.867649	1.44661	1.79495	1.98882	0.769281	0.683435
5
6
