# Supplementary material for: Temperature evolution following joint loading promotes chondrogenesis by synergistic cues via calcium signaling
Source: eLife. 2022 Mar 8;11:e72068. doi: 10.7554/eLife.72068 (PMC8903839; doi:10.7554/eLife.72068)
Supplement: Figure 4—source data 1. [file elife-72068-fig4-data1.xlsx]

## Sheet: Data Figure 4-Genes
Relative Gene Expression
Col-II	Control (DMSO)	Thermo-Mech (DMSO)	Control (GSK205)	Thermo-Mech (GSK205)	Control (EGTA)	Thermo-Mech (EGTA)
1	0.960657	2.04058	0.786725	1.84875	1.42059	1.07164
2	1.01176	1.98914	1.13423	1.08142	1.39092	0.691124
3	1.02885	2.39214	0.671079	1.26568	1.09638	1.1674
4		2.62908
Sox9	Control (DMSO)	Thermo-Mech (DMSO)	Control (GSK205)	Thermo-Mech (GSK205)	Control (EGTA)	Thermo-Mech (EGTA)
1	0.784722	3.52977	0.921521	2.74233	0.967847	2.64597
2	1.03408	2.76356	1.27025	2.70399	1.10245	2.62934
3	1.23234	3.08791	1.5469	3.09051	1.52314	2.411
4		4.92167
Agc	Control (DMSO)	Thermo-Mech (DMSO)	Control (GSK205)	Thermo-Mech (GSK205)	Control (EGTA)	Thermo-Mech (EGTA)
1	1.03502	2.89046	1.45485	2.14456	0.980753	1.12213
2	0.936546	2.76826	1.47366	2.00098	1.01443	0.995291
3	1.03162	2.76009	1.50067	2.513	0.938108	1.12181
4		3.59439
Twist1	Control (DMSO)	Thermo-Mech (DMSO)	Control (GSK205)	Thermo-Mech (GSK205)	Control (EGTA)	Thermo-Mech (EGTA)
1	1.04606	0.443459	0.673197	0.302472	0.892966	0.708621
2	0.911054	0.37597	0.560479	0.312639	0.842183	0.597031
3	1.0493	0.372477	0.589163	0.332993	0.8338	0.535596
4		0.460143
COMP	Control (DMSO)	Thermo-Mech (DMSO)	Control (GSK205)	Thermo-Mech (GSK205)	Control (EGTA)	Thermo-Mech (EGTA)
1	0.986488	1.95678	1.31494	2.40523	1.15266	0.725594
2	0.991203	2.11615	0.945353	2.49195	0.829171	0.694667
3	1.02269	2.26995	1.14701	2.42392	0.622167	0.908767
4		2.46135
Col-I	Control (DMSO)	Thermo-Mech (DMSO)	Control (GSK205)	Thermo-Mech (GSK205)	Control (EGTA)	Thermo-Mech (EGTA)
1	1.0824	1.82035	0.793649	1.37354	1.15266	0.984555
2	0.806205	1.37117	0.797411	1.20235	0.829171	0.751125
3	1.1195	1.28041	0.841838	1.29436	0.622167	1.36953
4		1.11001
